# Supplementary material for: Functionalization of a SiO2-coated magnetic graphene oxide composite with polyaniline–polypyrrole for magnetic solid phase extraction of ultra-trace Cr(iii) and Pb(ii) in water and food samples using a Box–Behnken design
Source: Royal Society of Chemistry journal article supplement (doi:10.1039/c9nj02038a), 2019-01-01
Supplement: c9nj02038a1.pdf [file c9nj02038a1.pdf]

**Table S1** Response surface experiment results based on the Box-Behnken design for the average recovery (*Y*) and three variables (*A-C*).

| Run | Independent variables |                |              | Response               |
|-----|-----------------------|----------------|--------------|------------------------|
|     | A pH                  | B sorbent (mg) | C time (min) | Y Average recovery (%) |
| 1   | 5                     | 20             | 6            | 95.9745                |
| 2   | 5                     | 10             | 3            | 77.7                   |
| 3   | 3                     | 30             | 6            | 59.1                   |
| 4   | 7                     | 10             | 6            | 77.3                   |
| 5   | 5                     | 10             | 9            | 77.3                   |
| 6   | 7                     | 30             | 6            | 86.3                   |
| 7   | 5                     | 20             | 6            | 94.5                   |
| 8   | 3                     | 20             | 9            | 63.6                   |
| 9   | 5                     | 30             | 3            | 80.1                   |
| 10  | 5                     | 20             | 6            | 94.73                  |
| 11  | 7                     | 20             | 9            | 87.2                   |
| 12  | 7                     | 20             | 3            | 81.2                   |
| 13  | 3                     | 20             | 3            | 60.521                 |
| 14  | 3                     | 10             | 6            | 62.2599                |
| 15  | 5                     | 30             | 9            | 80.1                   |
| 16  | 5                     | 20             | 6            | 92.799                 |
| 17  | 5                     | 20             | 6            | 94.371                 |

**Table S2** Analytical results for certified reference materials (n=3)

| Certified Reference Material              | Elements | Certified | Found                          | t-test <sup>b</sup> |
|-------------------------------------------|----------|-----------|--------------------------------|---------------------|
| GSBZ50009-88<br>( $\mu\text{g mL}^{-1}$ ) | Cr       | 0.276     | 0.282 $\pm$ 0.015 <sup>a</sup> | 0.69                |
|                                           | Pb       | 0.882     | 0.875 $\pm$ 0.051              | 0.24                |
| GBW10043<br>( $\mu\text{g g}^{-1}$ )      | Cr       | 0.140     | 0.136 $\pm$ 0.010              | 0.69                |
|                                           | Pb       | 0.075     | 0.073 $\pm$ 0.006              | 0.58                |

<sup>a</sup>  $t_{0.05,2} = 4.30$

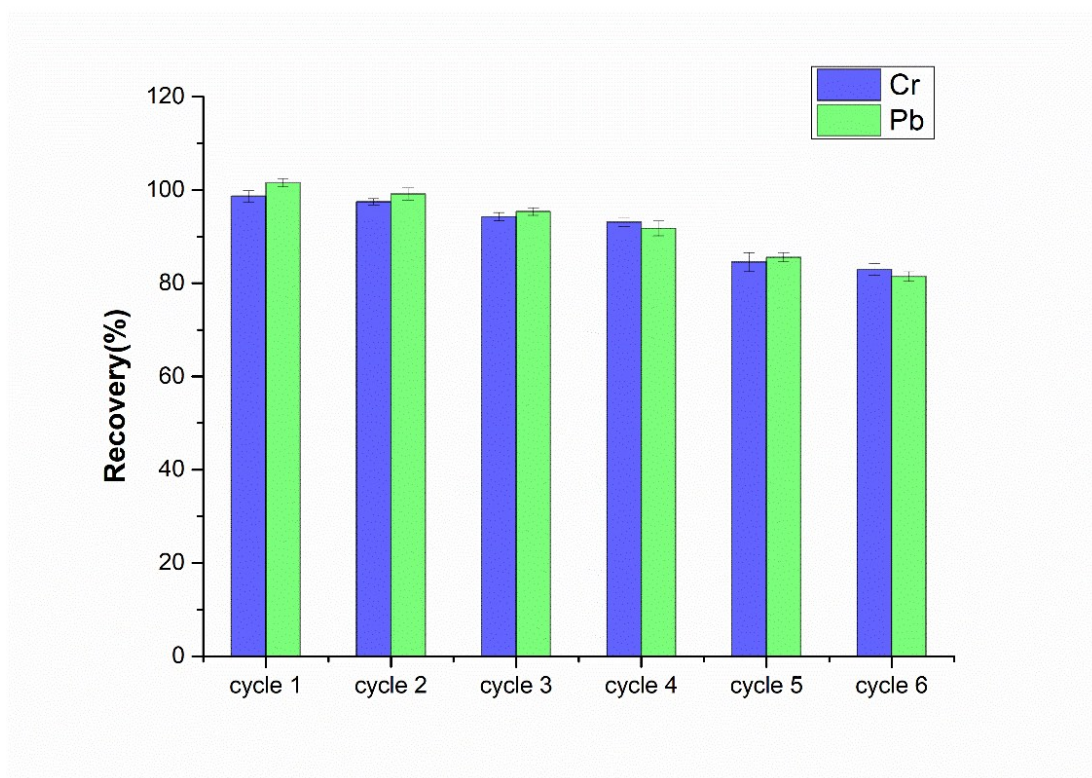

**Fig. S1** The effect of reuse of the MGO/SiO<sub>2</sub>@PANI-PPy on the recovery % of target metals for six cycles.
